# Supplementary material for: Reprogramming of human peripheral blood mononuclear cells into induced mesenchymal stromal cells using non-integrating vectors
Source: PubMed Central journal article supplement (PMC10090171; doi:10.1038/s42003-023-04737-x), 2023-04-11
Supplement: 42003_2023_4737_MOESM2_ESM.pdf [file 42003_2023_4737_MOESM2_ESM.pdf]

## Reprogramming of human peripheral blood mononuclear cells into induced mesenchymal stromal cells using non-integrating vectors

Wanqiu Chen<sup>1</sup>, Chenguang Wang<sup>1,2</sup>, Zhi-Xue Yang<sup>3,4</sup>, Feng Zhang<sup>3,4</sup>, Wei Wen<sup>3,4</sup>, Christoph Schaniel<sup>5</sup>, Xianqiang Mi<sup>2</sup>, Matthew Bock<sup>6</sup>, Xiao-Bing Zhang<sup>3\*</sup>, Hongyu Qiu<sup>7\*</sup>, Charles Wang<sup>1,8\*</sup>

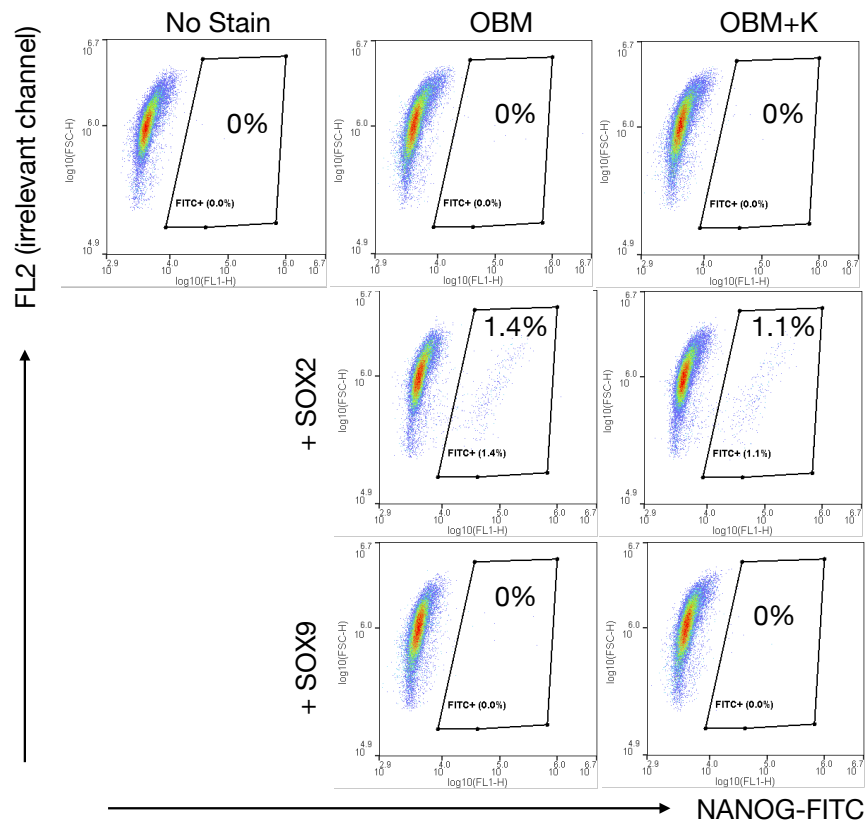

**Supplementary Figure 1. Flow cytometric analysis of iMSCs showing that reprogramming in the presence of SOX2 resulted in 1-2% reprogrammed cells that were NANOG positive while replacing SOX2 with SOX9 generated no detectable NANOG<sup>+</sup> cells.**

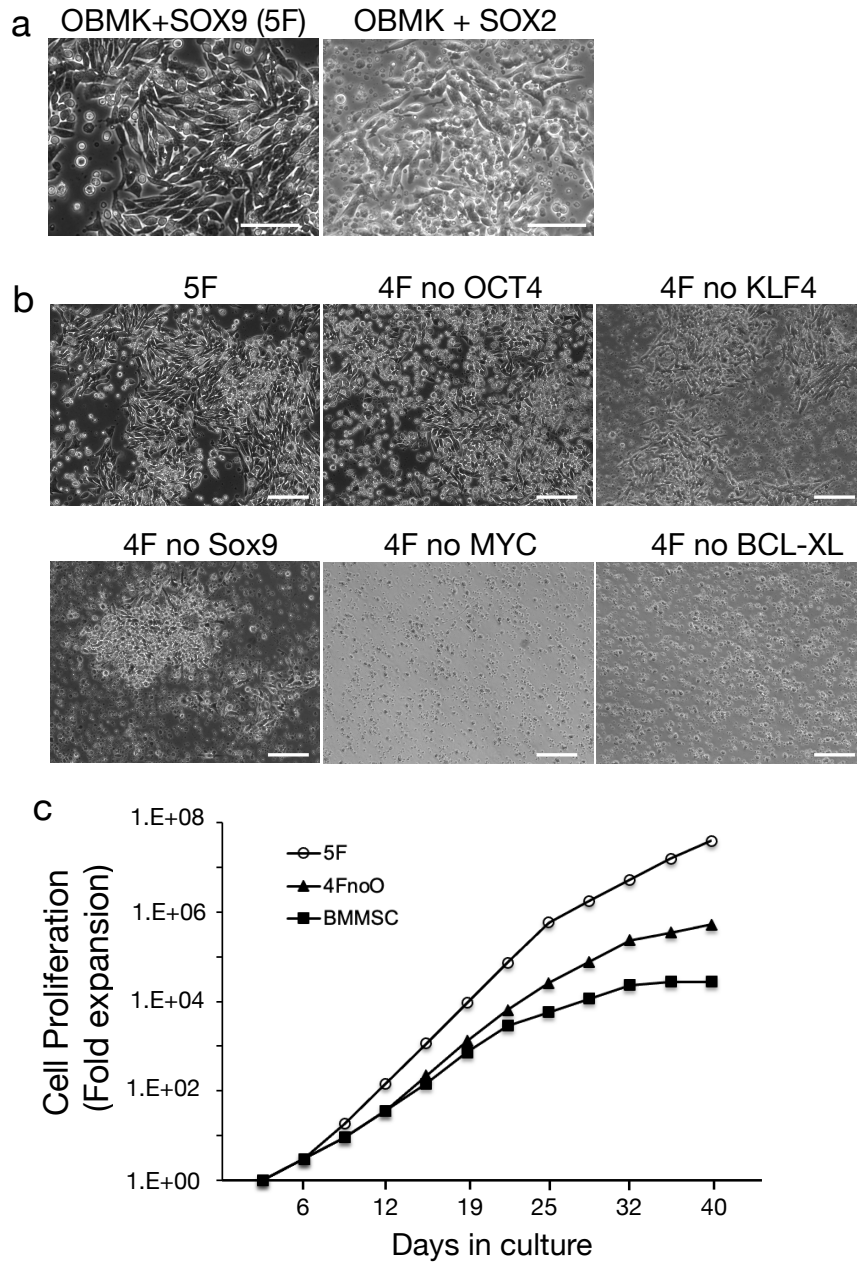

**Supplementary Figure 2. Representative images of human adult PBMCs transfected with different combinations of non-integrating episomal vectors at the day 7 post-transfection. (a)** PBMCs transfected with four reprogramming factors (OCT4, BCL-XL, MYC, and KLF4) as well as either SOX2 or SOX9. SOX9-reprogrammed cells displayed more spindle-like morphology. Scale bar represents 100  $\mu$ m. **(b)** PBMCs transfected with five reprogramming factors (OCT4, BCL-XL, MYC, KLF4, and SOX9), and any combination of four reprogramming factors by omitting a single factor to assess the essentiality of the five factors. Scale bar represents 200  $\mu$ m. **(c)** Proliferation of 5F iMSCs, 4FnoO iMSCs, and bone marrow derived human MSCs (BMMSC).

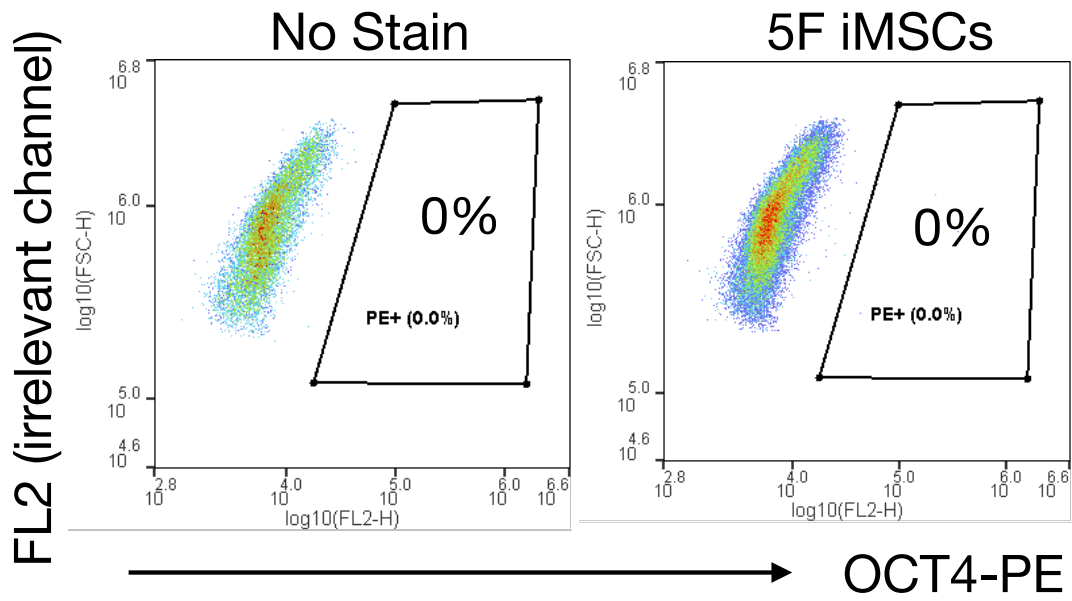

**Supplementary Figure 3. Flow cytometric analysis of iMSCs at one month after nucleofection showing that no detectable OCT4<sup>+</sup> cells.**

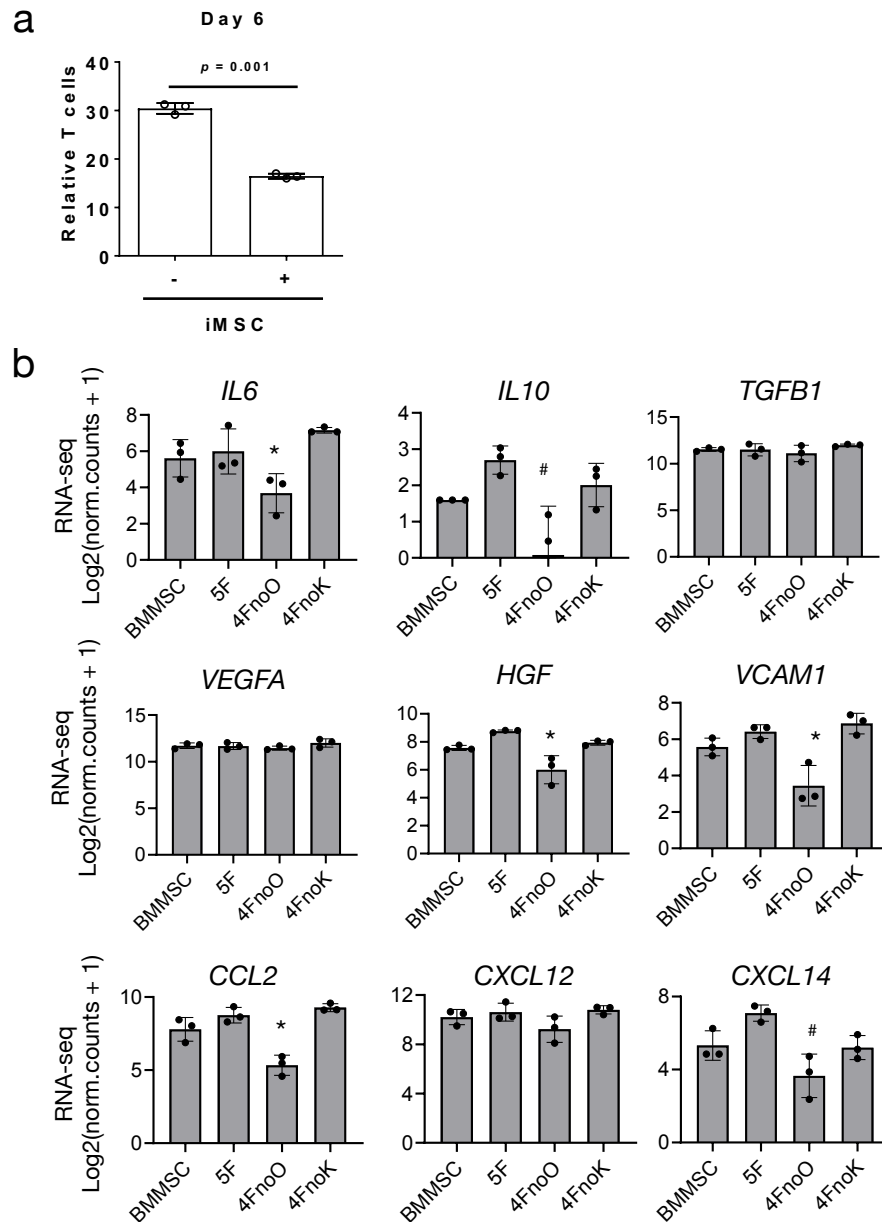

**Supplementary Figure 4. Immuno-modulating function and RNA-seq gene expression of immunomodulatory factors of iMSCs. (a)** iMSCs significantly inhibited T-cell proliferation after 6 days co-culture with PBMCs. **(b)** The bar plotting showing RNA-seq gene expression values of the representative genes of immunomodulatory cytokines, chemokines, and soluble factors secreted by MSCs. Human primary MSCs, i.e., bone marrow-derived MSCs (BMMSC) derived RNA-seq gene expression data<sup>23</sup> was used as control. RNA-seq gene expression levels are shown as log<sub>2</sub>() normalized read counts. n=3 in each group. \* $P < 0.05$  indicates the statistically significance using BMMSC as control group; # $P < 0.05$  indicates the statistically significance using the 5F MSC as control group; error bars indicate standard deviation.



# PBMC digital karyotyping

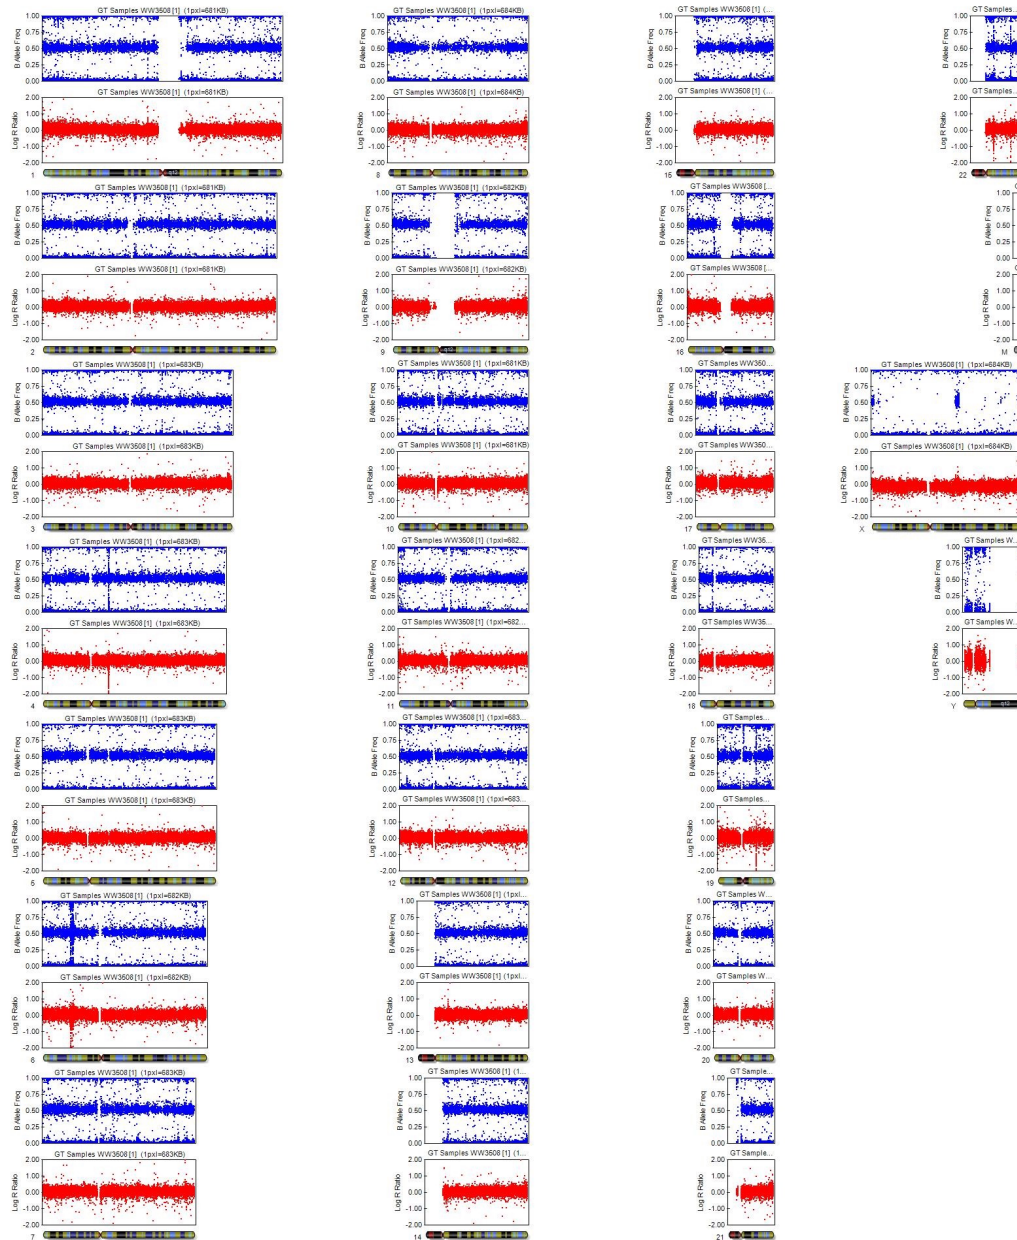

Supplementary Figure 5. Digital karyotyping by SNP array showing no chromosomal abnormalities in primary PBMCs.

# 5F iMSC digital karyotyping (*in vitro* culture for 1 week)

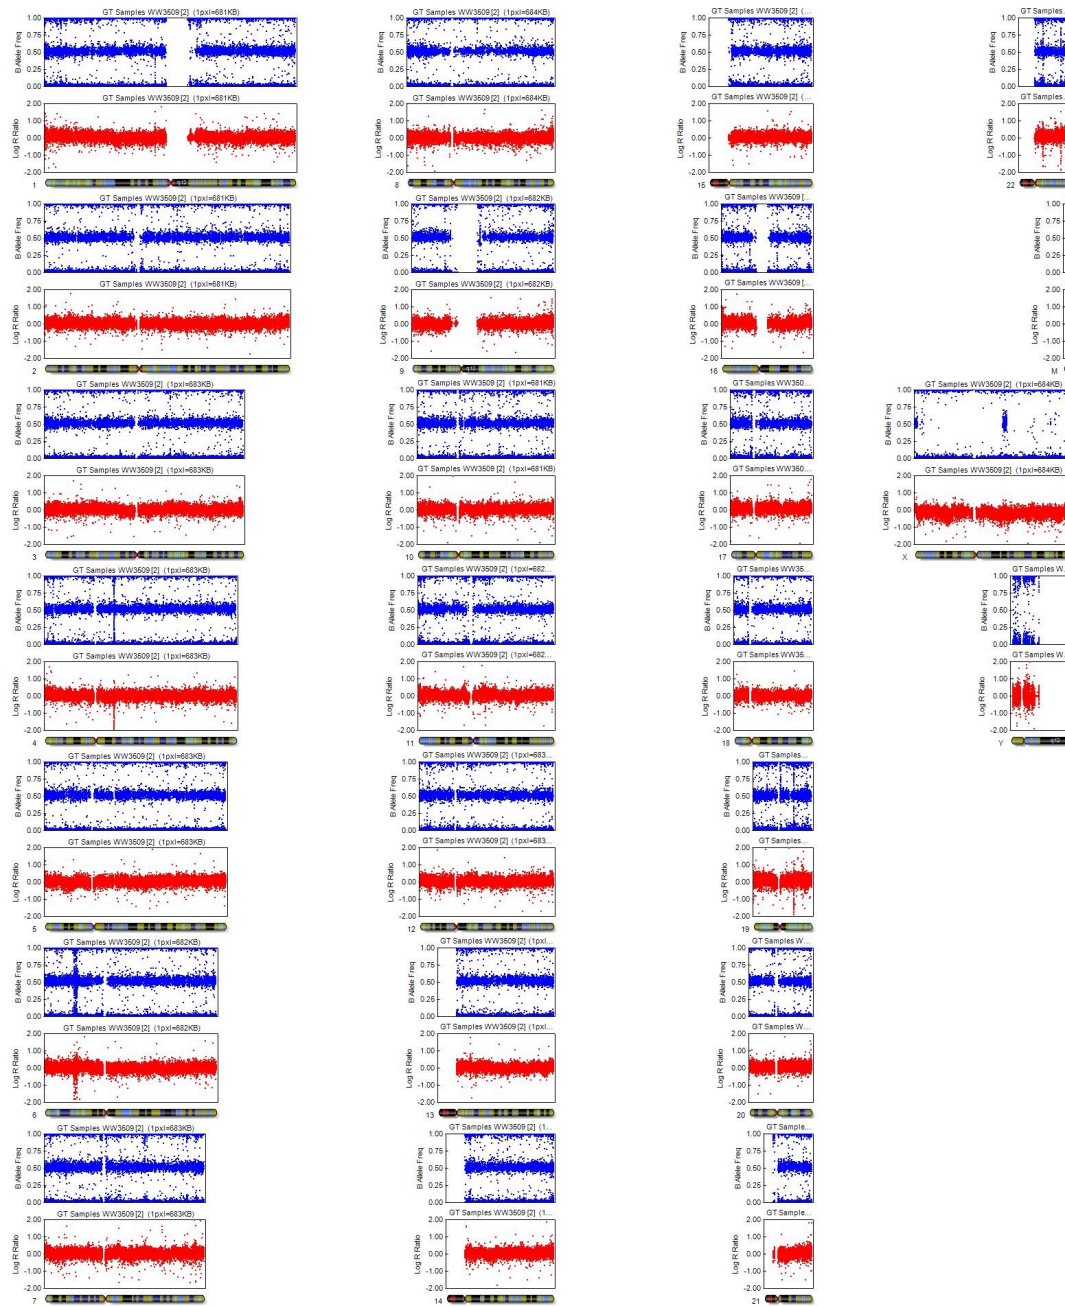

**Supplementary Figure 6. Digital karyotyping by SNP array showing no chromosomal abnormalities in 5F iMSCs after one-week *in vitro* culture.**

# 5F iMSC digital karyotyping (*in vitro* culture for 4 weeks)

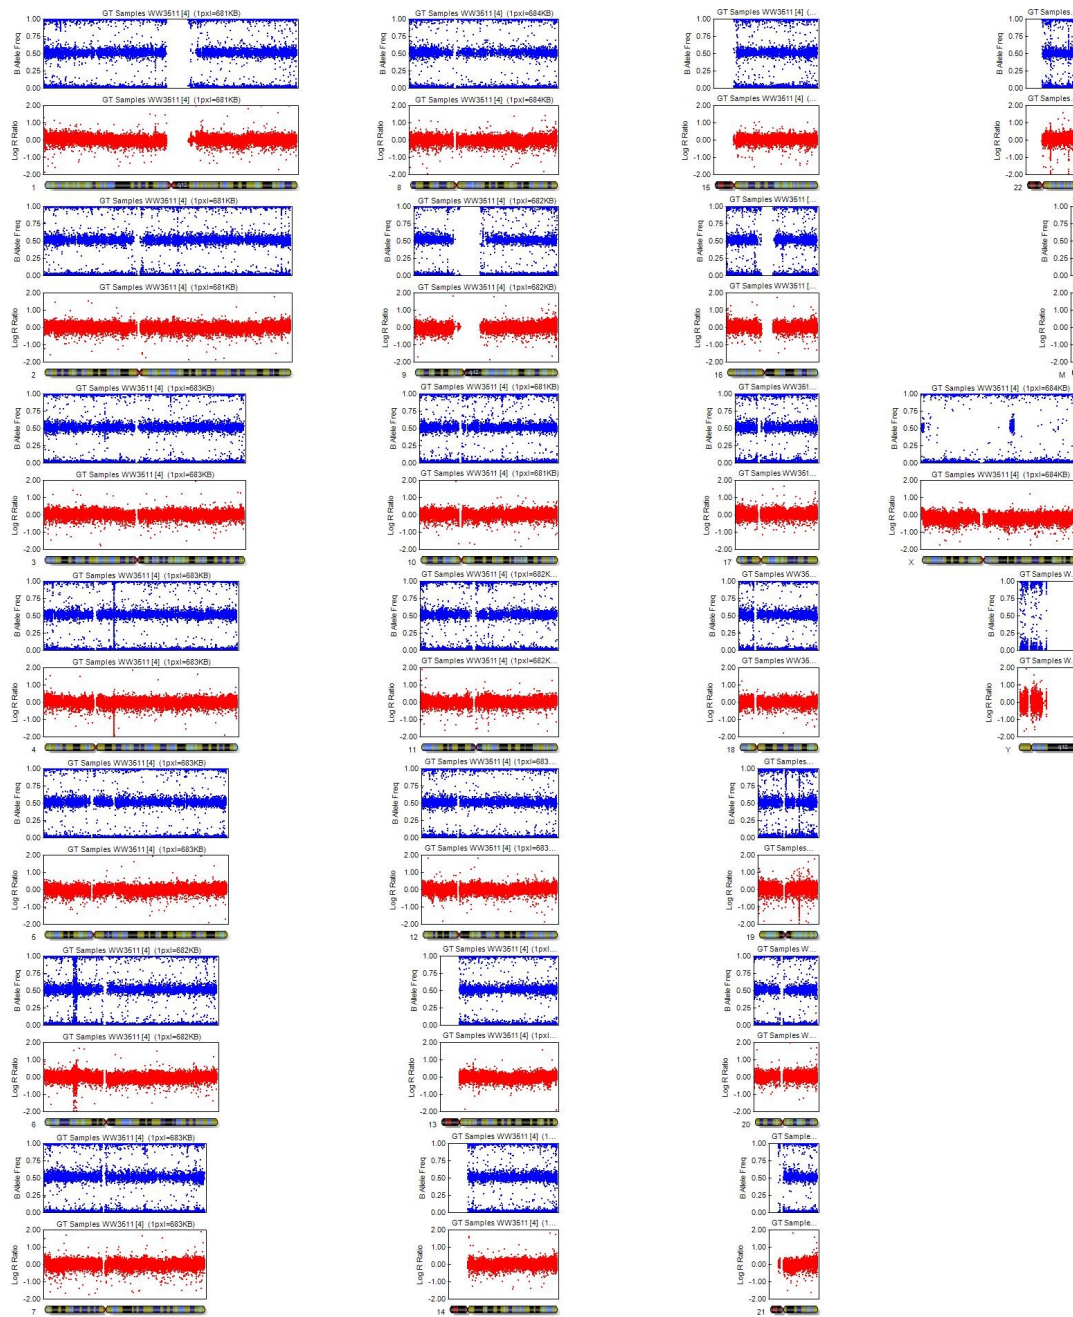

**Supplementary Figure 7. Digital karyotyping by SNP array showing no chromosomal abnormalities in 5F iMSCs after four-week *in vitro* culture.**



## 4FnoK versus 5F

Differential expression

● NS ● Log<sub>2</sub> FC ● p-value and log<sub>2</sub> FC

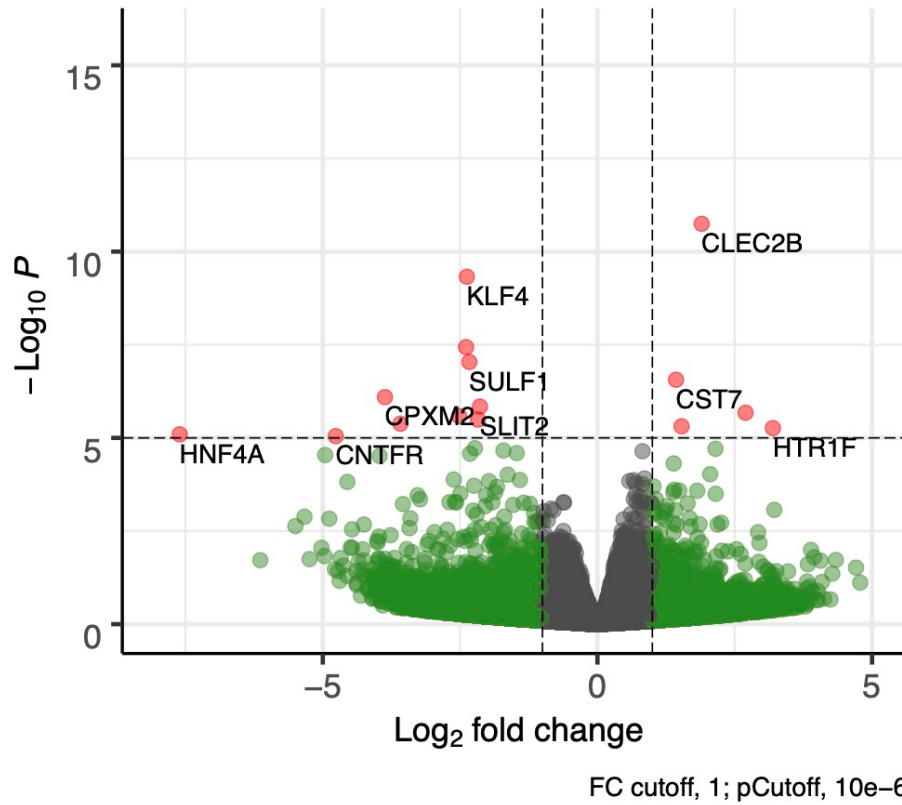

Supplementary Figure 8. Volcano plot showing the differential expressed genes between 5F iMSCs and 4FnoK iMSCs by RNA-seq (pCutoff = 10e<sup>-6</sup>, fold change > 2).

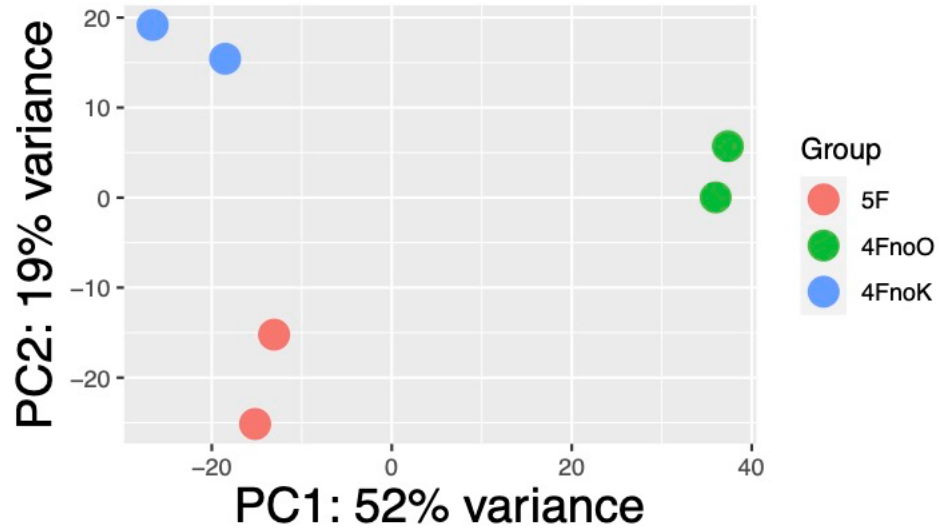

**Supplementary Figure 9. Principal component analysis (PCA) using normalized ATAC-seq read counts from 5F, 4FnoO, and 4FnoK iMSCs.** Each dot represents the chromatin accessibility profile of a biologically independent replicate.

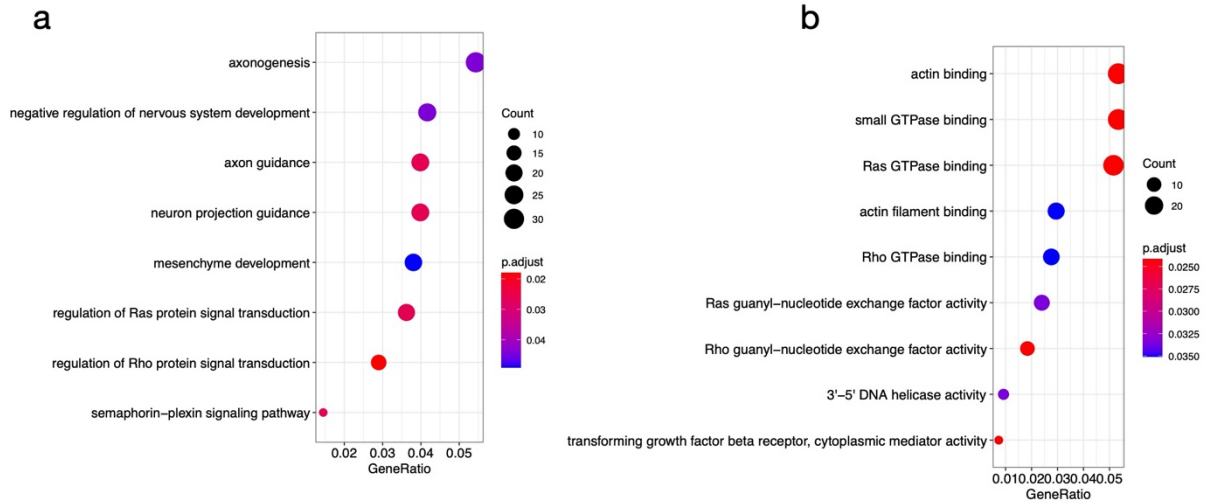

**Supplementary Figure 10. Gene Ontology enrichment analysis of (a) biological processes and (b) cellular component for differential methylated genes between 5F iMSCs and 4Fno iMSCs.**

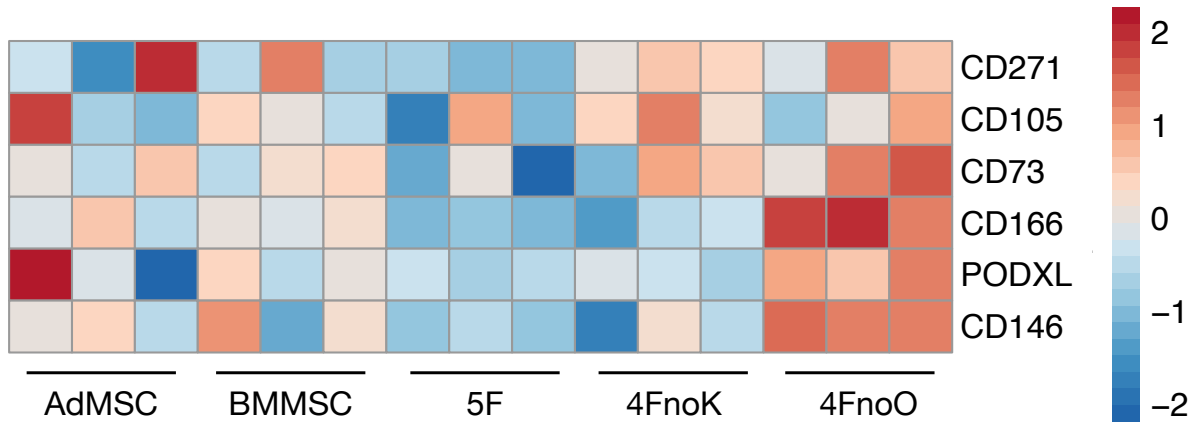

**Supplementary Figure 11. The expression of typical MSC surface markers on primary MSCs and iMSCs.** Heatmap showing the normalized gene count after  $\log_2()$  transformation from RNA-seq data.

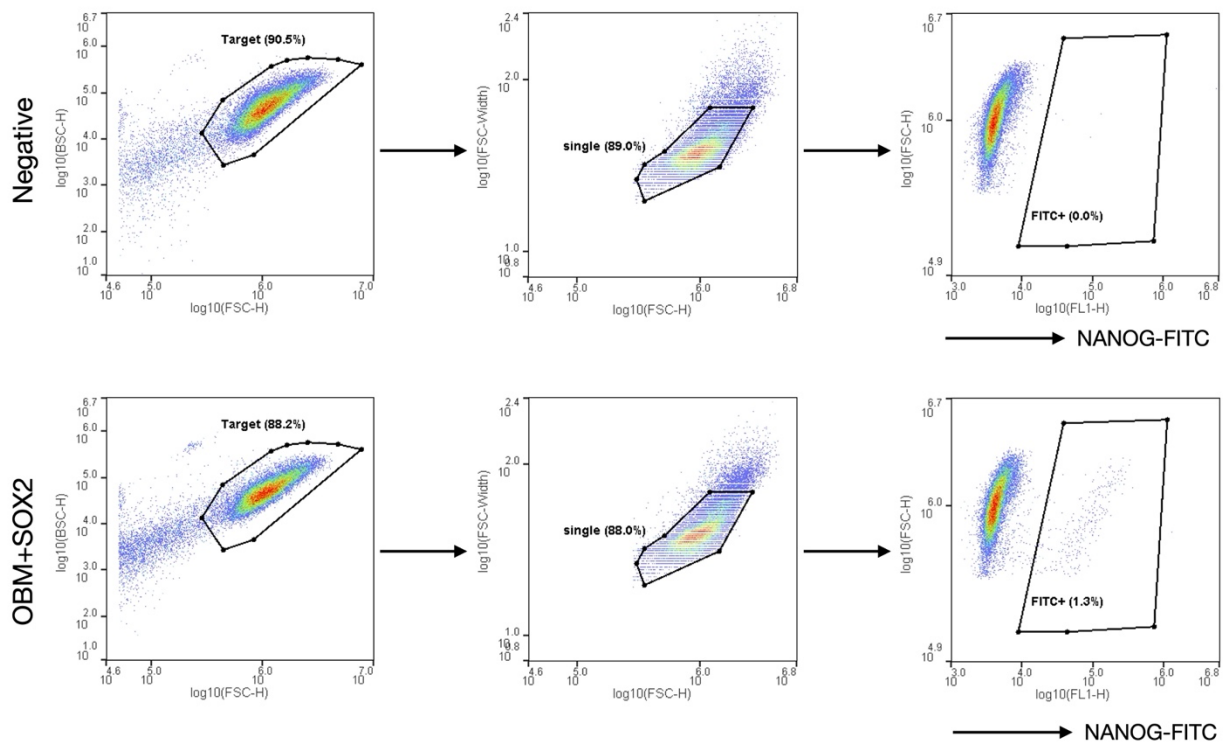

**Supplementary Figure 12. Representative flow cytometry gating strategies.** Scatterplots of forward scatter vs. side scatter showing live cell gating followed by single cell gating. Flow cytometric analysis of iMSCs showing that reprogramming in the presence of SOX2 resulted in 1-2% reprogrammed cells that were NANOG positive.



**Supplementary Table 1. DEG overlapping DMG (4FnoO iMSCs vs. 5F iMSCs)**

| Symbol      | Ensembl ID | BaseMean | log2Fold Change | lfcSE   | pvalue | padj  |
|-------------|------------|----------|-----------------|---------|--------|-------|
|             |            | log2Fold |                 |         |        |       |
|             | baseMean   | Change   | lfcSE           | stat    | pvalue | padj  |
| HPDL        | 138.376    | -1.475   | 0.517           | -2.850  | 0.004  | 0.050 |
| COL24A1     | 276.043    | -2.662   | 0.514           | -5.176  | 0.000  | 0.000 |
| F3          | 202.154    | 1.295    | 0.391           | 3.311   | 0.001  | 0.014 |
| PALMD       | 228.902    | -3.117   | 0.357           | -8.727  | 0.000  | 0.000 |
| IGSF3       | 245.693    | -2.330   | 0.533           | -4.371  | 0.000  | 0.000 |
| ARHGAP30    | 486.515    | 1.701    | 0.304           | 5.589   | 0.000  | 0.000 |
| LAMC2       | 78.083     | -2.595   | 0.621           | -4.179  | 0.000  | 0.001 |
| PLXNA2      | 448.062    | 1.344    | 0.435           | 3.089   | 0.002  | 0.027 |
| RNF144A-AS1 | 71.549     | -1.541   | 0.427           | -3.609  | 0.000  | 0.006 |
| LINC01819   | 38.115     | 1.984    | 0.515           | 3.851   | 0.000  | 0.003 |
| EPAS1       | 242.647    | 1.444    | 0.325           | 4.437   | 0.000  | 0.000 |
| FHL2        | 921.563    | -2.059   | 0.333           | -6.181  | 0.000  | 0.000 |
| SOWAHC      | 257.198    | -2.658   | 0.503           | -5.286  | 0.000  | 0.000 |
| GALNT3      | 722.413    | 1.267    | 0.363           | 3.492   | 0.000  | 0.008 |
| KCNE4       | 32.279     | -2.559   | 0.755           | -3.390  | 0.001  | 0.011 |
| SEMA3B      | 295.663    | 1.109    | 0.315           | 3.523   | 0.000  | 0.007 |
| NT5DC2      | 2021.290   | -1.006   | 0.254           | -3.963  | 0.000  | 0.002 |
| WNT5A       | 843.097    | -2.166   | 0.471           | -4.598  | 0.000  | 0.000 |
| EOGT        | 1021.022   | -1.174   | 0.244           | -4.814  | 0.000  | 0.000 |
| FRMD4B      | 331.476    | 1.005    | 0.341           | 2.949   | 0.003  | 0.038 |
| KLHL6       | 76.287     | 2.707    | 0.537           | 5.039   | 0.000  | 0.000 |
| HAND2       | 64.516     | -3.806   | 0.708           | -5.374  | 0.000  | 0.000 |
| PLEKHG4B    | 98.849     | -3.373   | 0.448           | -7.522  | 0.000  | 0.000 |
| ENC1        | 1525.267   | -1.603   | 0.393           | -4.076  | 0.000  | 0.001 |
| GFPT2       | 1023.661   | -2.398   | 0.502           | -4.778  | 0.000  | 0.000 |
| SLC22A23    | 337.725    | -2.005   | 0.425           | -4.715  | 0.000  | 0.000 |
| COL12A1     | 7985.834   | 1.534    | 0.227           | 6.769   | 0.000  | 0.000 |
| GRIK2       | 241.869    | 2.738    | 0.414           | 6.618   | 0.000  | 0.000 |
| TFPI2       | 1901.989   | -5.173   | 1.038           | -4.985  | 0.000  | 0.000 |
| DUSP4       | 1406.671   | -1.681   | 0.424           | -3.967  | 0.000  | 0.002 |
| ZFHX4       | 887.306    | -4.892   | 0.437           | -11.203 | 0.000  | 0.000 |
| DENND3      | 195.507    | 1.619    | 0.315           | 5.145   | 0.000  | 0.000 |
| ABCA1       | 624.513    | -2.152   | 0.375           | -5.743  | 0.000  | 0.000 |
| OLFML2A     | 1693.597   | 2.396    | 0.310           | 7.724   | 0.000  | 0.000 |
| PLPP7       | 45.761     | -1.364   | 0.408           | -3.345  | 0.001  | 0.013 |
| COL5A1      | 15474.888  | -1.520   | 0.444           | -3.423  | 0.001  | 0.010 |
| SLIT1       | 51.291     | -3.700   | 0.784           | -4.720  | 0.000  | 0.000 |
| EPS8L2      | 425.508    | 1.340    | 0.256           | 5.224   | 0.000  | 0.000 |
| NRXN2       | 20.903     | -2.086   | 0.563           | -3.702  | 0.000  | 0.004 |

|           |           |        |       |         |       |       |
|-----------|-----------|--------|-------|---------|-------|-------|
| ALDH3B1   | 372.252   | 1.394  | 0.347 | 4.016   | 0.000 | 0.001 |
| NCAM1     | 488.208   | -4.717 | 0.439 | -10.733 | 0.000 | 0.000 |
| PKNOX2    | 423.280   | 1.349  | 0.305 | 4.427   | 0.000 | 0.000 |
| IRS2      | 680.866   | -2.245 | 0.347 | -6.471  | 0.000 | 0.000 |
| GCH1      | 144.350   | -1.405 | 0.358 | -3.925  | 0.000 | 0.002 |
| CCDC88C   | 298.078   | 1.424  | 0.333 | 4.277   | 0.000 | 0.001 |
| CRIP2     | 522.616   | 1.329  | 0.275 | 4.834   | 0.000 | 0.000 |
| THBS1     | 39420.693 | 2.289  | 0.347 | 6.587   | 0.000 | 0.000 |
| C2CD4A    | 37.237    | -4.439 | 1.010 | -4.397  | 0.000 | 0.000 |
| GPRC5B    | 185.104   | -2.595 | 0.378 | -6.870  | 0.000 | 0.000 |
| NDRG4     | 139.239   | -1.342 | 0.449 | -2.990  | 0.003 | 0.035 |
| ADORA2B   | 115.486   | -1.081 | 0.356 | -3.039  | 0.002 | 0.031 |
| KRT16     | 16.151    | -3.511 | 0.992 | -3.541  | 0.000 | 0.007 |
| ETV4      | 373.134   | -2.161 | 0.362 | -5.977  | 0.000 | 0.000 |
| TANC2     | 1195.306  | -1.103 | 0.200 | -5.527  | 0.000 | 0.000 |
| SOCS3     | 1034.345  | -1.696 | 0.389 | -4.363  | 0.000 | 0.000 |
| TNFRSF11A | 60.001    | 4.506  | 0.624 | 7.219   | 0.000 | 0.000 |
| CTXN1     | 122.843   | -1.640 | 0.369 | -4.450  | 0.000 | 0.000 |
| RDH8      | 8.616     | -4.636 | 1.280 | -3.623  | 0.000 | 0.005 |
| DMKN      | 35.035    | 4.359  | 0.809 | 5.387   | 0.000 | 0.000 |
| PPP1R13L  | 352.151   | 1.368  | 0.357 | 3.837   | 0.000 | 0.003 |
| SLC8A2    | 589.649   | -5.589 | 0.960 | -5.823  | 0.000 | 0.000 |
| PPFIA3    | 31.666    | -1.663 | 0.495 | -3.364  | 0.001 | 0.012 |
| B4GALT5   | 1220.196  | -1.037 | 0.186 | -5.588  | 0.000 | 0.000 |
| SALL4     | 201.538   | -3.693 | 0.574 | -6.429  | 0.000 | 0.000 |
| LAMA5     | 1424.364  | 1.287  | 0.240 | 5.356   | 0.000 | 0.000 |
| FAM227A   | 51.292    | -1.093 | 0.363 | -3.013  | 0.003 | 0.033 |
| SLC9A7    | 1238.330  | 1.545  | 0.332 | 4.647   | 0.000 | 0.000 |

---

**Supplementary Table 2. Primer sequences used for RT-qPCR analysis**

| <b>Gene</b>    | <b>Direction</b> | <b>Primer Sequence</b>        |
|----------------|------------------|-------------------------------|
| <i>ALP</i>     | Forward          | 5' -GAACAGGGCTTCTCAAGGTG -3'  |
|                | Reverse          | 5' -CAGTTCCGTCCCATTTCTTA -3'  |
| <i>SP7</i>     | Forward          | 5' -GGCACAAAGAAGCCGTA CT -3'  |
|                | Reverse          | 5' -CACTGGGCAGACAGTCAGAA -3'  |
| <i>RUNX2</i>   | Forward          | 5' -TTTGC ACTGGGTCATGTGTT -3' |
|                | Reverse          | 5' -TGGCTGCATTGAAAAGACTG -3'  |
| <i>LPL</i>     | Forward          | 5' -ATTTGCCCTAAGGACCCC -3'    |
|                | Reverse          | 5' -ATGACAGGTAGCCACGGAC -3'   |
| <i>FABP4</i>   | Forward          | 5' -TACTGGGCCAGGAATTTGAC -3'  |
|                | Reverse          | 5' -GTGGAAGTGACGCCTTTTCAT -3' |
| <i>SOX9</i>    | Forward          | 5' -GACTTCCGCGACGTGGAC -3'    |
|                | Reverse          | 5' -GTTGGGCGGCAGGTA CT -3'    |
| <i>ACAN</i>    | Forward          | 5' -CGCTACTCGCTGACCTTT -3'    |
|                | Reverse          | 5' -GCTCATAGCCTGCTTCGT -3'    |
| <i>COL10A1</i> | Forward          | 5' -CAGGCATAAAAGGCCCACTA -3'  |
|                | Reverse          | 5' -AGGACTTCCGTAGCCTGGTT -3'  |
| <i>COL1A1</i>  | Forward          | 5' -GCCATCAAAGTCTTCTGC -3'    |
|                | Reverse          | 5' -ATCCATCGGTCATGCTCT -3'    |
| <i>ACTB</i>    | Forward          | 5' -TCGTGCGTGACATTAAGGAG -3'  |
|                | Reverse          | 5' -GGCAGCTCGTAGCTCTTCTC -3'  |

**Supplementary Table 3. RNA-seq, ATAC-seq, and RRBS libraries sequencing summary**

| <b>Library_ID</b> | <b>Group</b> | <b>Sequence length</b> | <b>Reads (M)</b> | <b>Application</b> | <b>PBMC Donor</b> | <b>Platform</b> |
|-------------------|--------------|------------------------|------------------|--------------------|-------------------|-----------------|
| CFG2295           | 5F           | 100x1 bp               | 24.8             | RNA-seq            | PM18              | HiSeq4000       |
| CFG2296           | 4FnoO        | 100x1 bp               | 31.6             |                    | PM18              | HiSeq4000       |
| CFG2334           | 4FnoK        | 100x1 bp               | 24.7             |                    | PM18              | HiSeq4000       |
| CFG2336           | 5F           | 100x1 bp               | 26.2             |                    | PM10              | HiSeq4000       |
| CFG2337           | 4FnoK        | 100x1 bp               | 22.6             |                    | PM10              | HiSeq4000       |
| CFG2338           | 4FnoO        | 100x1 bp               | 27.3             |                    | PM10              | HiSeq4000       |
| RS193             | 5F           | 150x1 bp               | 24.1             |                    | PM9               | HiSeq4000       |
| RS194             | 4FnoO        | 150x1 bp               | 30.5             |                    | PM9               | HiSeq4000       |
| RS195             | 4FnoK        | 150x1 bp               | 27.5             |                    | PM9               | HiSeq4000       |
| CFG2357           | 5F           | 75x2 bp                | 60.6             | ATAC-seq           | PM10              | NextSeq550      |
| CFG2358           | 4FnoO        | 75x2 bp                | 64.6             |                    | PM10              | NextSeq550      |
| CFG2359           | 4FnoK        | 75x2 bp                | 71               |                    | PM10              | NextSeq550      |
| CFG2360           | 5F           | 75x2 bp                | 69               |                    | PM9               | NextSeq550      |
| CFG2361           | 4FnoO        | 75x2 bp                | 76.4             |                    | PM9               | NextSeq550      |
| CFG2363           | 4FnoK        | 75x2 bp                | 76.4             |                    | PM9               | NextSeq550      |
| CFG2351           | 5F           | 100x1 bp and 75x1 bp   | 29.5             | RRBS               | PM18              | HiSeq4000       |
| CFG2352           | 4FnoO        | 100x1 bp and 75x1 bp   | 32.6             |                    | PM18              | HiSeq4000       |
| CFG2353           | 4FnoK        | 100x1 bp and 75x1 bp   | 29.1             |                    | PM18              | HiSeq4000       |
| CFG2354           | 5F           | 100x1 bp and 75x1 bp   | 30.2             |                    | PM10              | HiSeq4000       |
| CFG2355           | 4FnoO        | 100x1 bp and 75x1 bp   | 30.5             |                    | PM10              | HiSeq4000       |
| CFG2356           | 4FnoK        | 100x1 bp and 75x1 bp   | 30.1             |                    | PM10              | HiSeq4000       |
