# Supplementary material for: Reprogramming of human peripheral blood mononuclear cells into induced mesenchymal stromal cells using non-integrating vectors
Source: PubMed Central journal article supplement (PMC10090171; doi:10.1038/s42003-023-04737-x), 2023-04-11
Supplement: 42003_2023_4737_MOESM3_ESM.pdf [file 42003_2023_4737_MOESM3_ESM.pdf]

## Description of Additional Supplementary Files

**File name:** Supplementary Data 1

**Description:** The source data for figure 1c

**File name:** Supplementary Data 2

**Description:** The source data for figure 2b

**File name:** Supplementary Data 3

**Description:** The source data for figure 2f and supplementary figure 4a

**File name:** Supplementary Data 4

**Description:** The source data for figure 3a

**File name:** Supplementary Data 5

**Description:** The source data for figure 3d-3f

**File name:** Supplementary Data 6

**Description:** The source data for Supplementary figure 4b

**File name:** Supplementary Data 7

**Description:** DEGs of 4FnoO iMSCs vs. 5F iMSCs.

**File name:** Supplementary Data 8

**Description:** The source data for figure 5e, 6f, and 7d

**File name:** Supplementary Data 9

**Description:** The source data for figure 6a and 6b

**File name:** Supplementary Data 10

**Description:** DMCs of 4FnoO iMSCs vs. 5F iMSCs
